# Supplementary material
Source: publisher site journal article supplement (https://www.dovepress.com/article/400925)
Supplement: Supplementary file 1 [file get_supplementary_file.php]

**Supplementary Table 1. Baseline characteristics of patients according to sICH**

| Variables | Non-sICH (n=386) | sICH (n=40) | *P* |
| --- | --- | --- | --- |
| Demographic characteristics |  |  |  |
| Age, years | 71 (63, 78) | 76 (67, 83) | 0.007 |
| Male, % | 248 (64.2) | 25 (62.5) | 0.826 |
| Vascular risk factors, % |  |  |  |
| Hypertension | 262 (67.9) | 31 (77.5) | 0.211 |
| Diabetes mellitus | 70 (18.1) | 9 (22.5) | 0.499 |
| Dyslipidemia | 47(12.2) | 7 (17.5) | 0.335 |
| Coronary heart disease | 72 (19.0) | 7 (17.5) | 0.868 |
| Atrial fibrillation | 106 (27.5) | 23 (57.5) | < 0.001 |
| Previous stroke | 92 (23.9) | 7 (17.5) | 0.362 |
| Smoking |  |  | 0.388 |
| Never | 217 (56.4) | 27(67.5) |  |
| Former | 122 (31.7) | 9(22.5) |  |
| Current | 46 (11.9) | 4(10.0) |  |
| Drinking alcohol |  |  | 0.208 |
| Never | 255 (66.2) | 32 (80.0) |  |
| Former | 95 (24.8) | 6 (15.0) |  |
| Current | 35 (9.0) | 2 (5.0) |  |
| Clinical data |  |  |  |
| Previous antiplatelet, % | 67 (17.4) | 7 (17.5) | 0.982 |
| Previous statin, % | 37 (9.6) | 3 (7.5) | 0.664 |
| Initial NIHSS score | 14 (11, 18) | 17.0 (14, 21) | 0.007 |
| SBP, mmHg | 137 (124, 153) | 142 (128, 157) | 0.334 |
| DBP, mmHg | 84.2±14.6 | 89.1±16.6 | 0.045 |
| Intravenous thrombolysis, % | 158 (40.9) | 22 (55.0) | 0.086 |
| Door-to-puncture time, min | 105.0 (75.0, 132.0) | 119.0 (78.0,147.0) | 0.335 |
| Onset-to-puncture time, min | 243.0 (177.0, 305.0) | 220.0 (190.0,275.0) | 0.375 |
| Number of device passes | 2 (1, 3) | 2 (1, 4) | 0.013 |
| Poor collateral status, % | 166 (43.0) | 23 (57.5) | 0.079 |
| Successful recanalization, % | 331 (85.8) | 36 (90.0) | 0.459 |
| Stroke subtype, % |  |  | 0.003 |
| LAA | 174 (45.1) | 7 (17.5) |  |
| CE | 166 (43.0) | 25 (62.5) |  |
| Other subtypes | 46 (11.9) | 8 (20.0) |  |
| Laboratory data |  |  |  |
| TC, mmol/L | 4.14 (3.42, 5.00) | 4.33 (3.64, 5.02) | 0.434 |
| TG, mmol/L | 1.06 (0.76, 1.53) | 1.03 (0.78, 1.43) | 0.545 |
| LDL, mmol/L | 2.49 (1.92, 3.15) | 2.64 (2.04, 3.07) | 0.722 |
| HDL, mmol/L | 1.06 (0.89,1.28) | 1.23 (1.08,1.42) | 0.002 |
| FBG, mmol/L | 6.31 (5.16,7.69) | 7.96 (6.62,9.87) | < 0.001 |
| NSE, ng/mL | 15.16 (12.58, 19.55) | 23.47 (17.70, 31.66) | < 0.001 |

Abbreviation: sICH, symptomatic intracranial hemorrhage; NIHSS, National Institutes of Health Stroke Scale; SBP, Systolic blood pressure; DBP, Diastolic blood pressure; LAA, large-artery atherosclerosis; CE, cardioembolism; TC, total cholesterol; TG, triglyceride; LDL, low-density lipoprotein; HDL, high-density lipoprotein; FBG, fasting blood glucose; NSE, neuron specific enolase.

**Supplementary Figure 1**


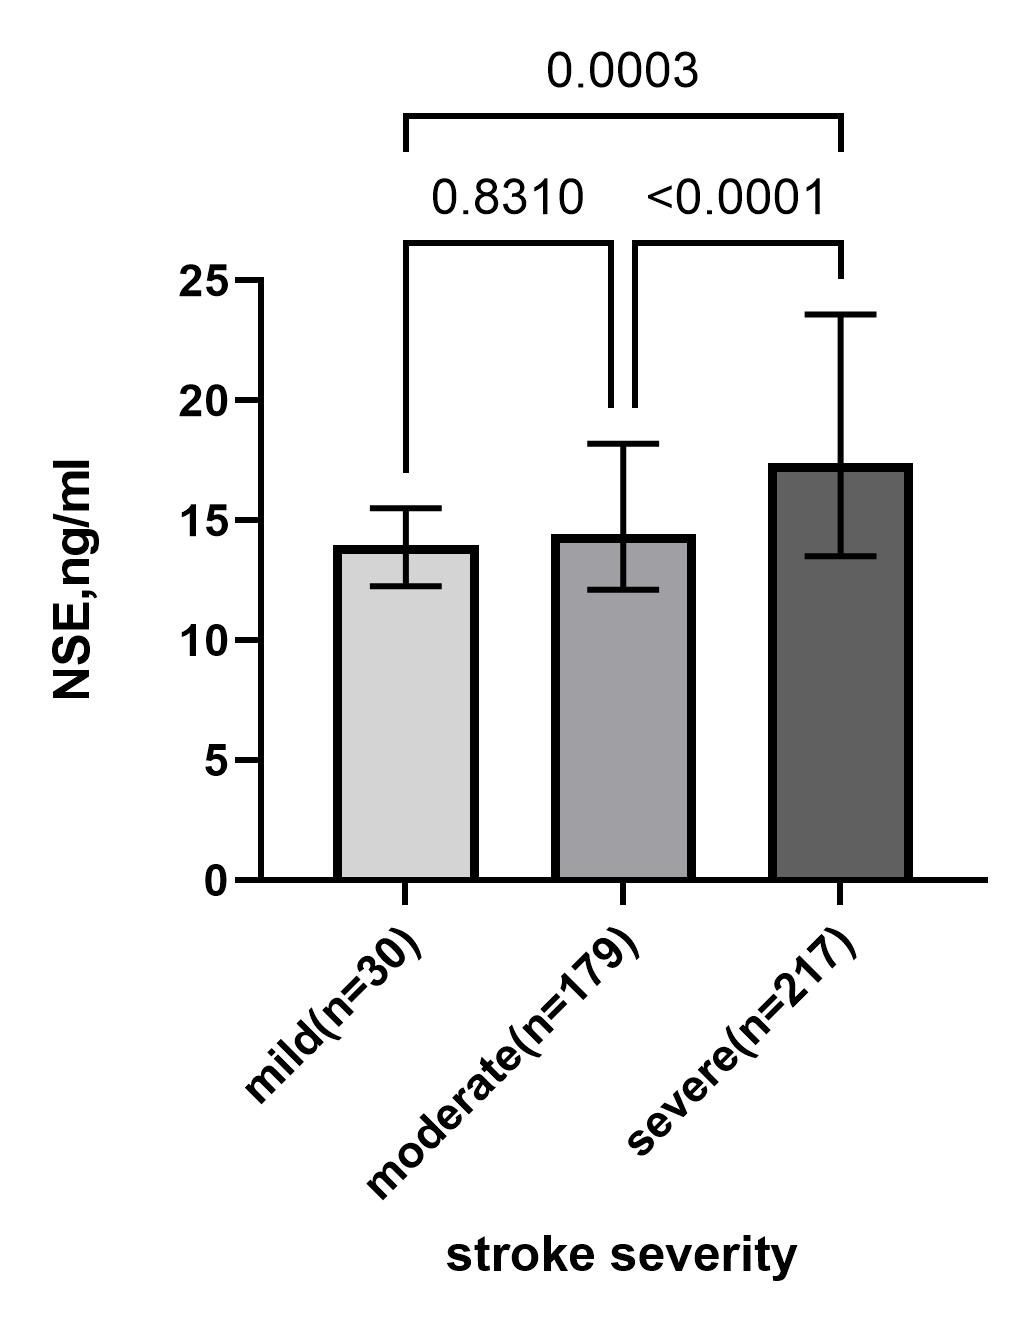


**Supplementary Figure 1** Comparisons of NSE levels between mild (NIHSS 0-4), moderate (NIHSS 5-14) and severe (NIHSS >14) stroke. Value represents median; error bars represent interquartile range

**Supplementary Figure 2**


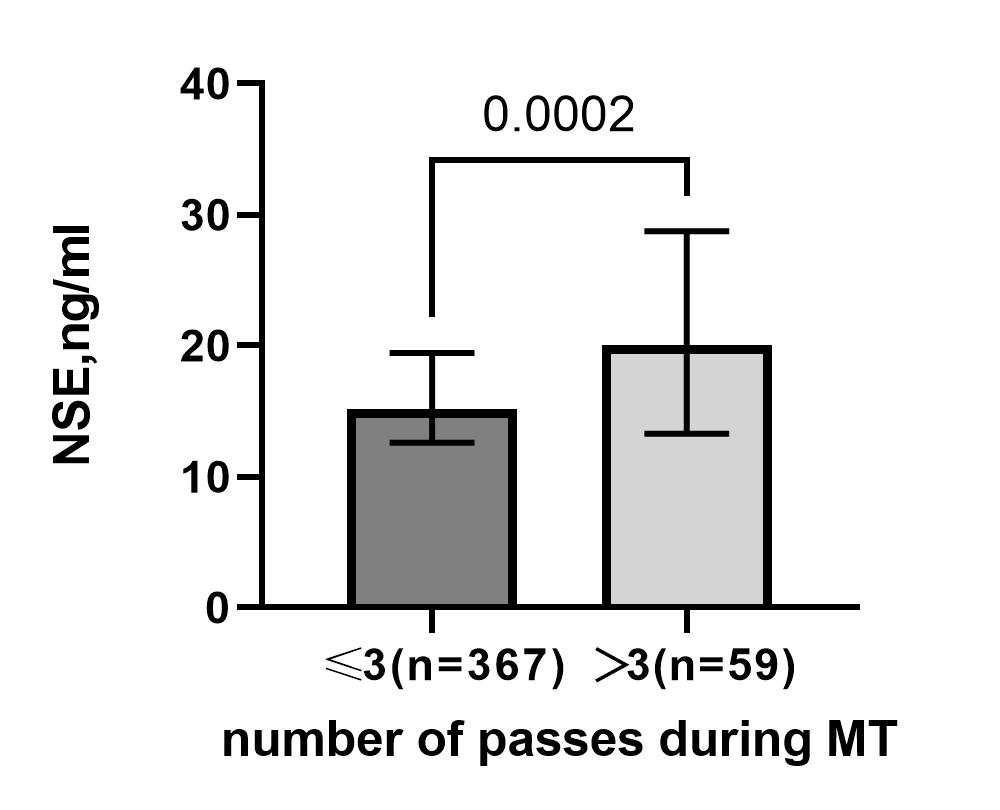


**Supplementary Figure 2** Comparisons of NSE levels based on number of passes during MT. Value represents median; error bars represent interquartile range
